# Supplementary material for: Synergy Between Proline-Rich Antimicrobial Peptides and Small Molecule Antibiotics Against Selected Gram-Negative Pathogens in vitro and in vivo
Source: PubMed Central journal article supplement (PMC6102830; doi:10.3389/fchem.2018.00309), 2018-08-14
Supplement: Data_Sheet_1.pdf [file Data_Sheet_1.pdf]

## Supplementary Material

Treatment schedule in bacteremia Assays 1 (top) and 2 (bottom)

| Group | Treatment               | Dosing (hour) |   |   |    |    |    |    |
|-------|-------------------------|---------------|---|---|----|----|----|----|
|       |                         | 1             | 2 | 5 | 13 | 14 | 25 | 26 |
| 1     | PBS (sc)                |               |   |   |    |    |    |    |
|       |                         |               |   |   |    |    |    |    |
| 2     | Imipenem (30 mg/kg sc)  |               |   |   |    |    |    |    |
|       |                         |               |   |   |    |    |    |    |
| 3     | Imipenem (30 mg/kg sc)  |               |   |   |    |    |    |    |
|       | A3-APO (1.0 mg/kg im)   |               |   |   |    |    |    |    |
| 4     | Colistin (10 mg/kg sc)  |               |   |   |    |    |    |    |
|       |                         |               |   |   |    |    |    |    |
| 5     | Colistin (10 mg/kg sc)  |               |   |   |    |    |    |    |
|       | A3-APO (1.0 mg/kg im)   |               |   |   |    |    |    |    |
| 6     | Colistin (10 mg/kg sc)  |               |   |   |    |    |    |    |
|       | A3-APO (0.5 mg/kg im)   |               |   |   |    |    |    |    |
| 7     | Colistin (1.0 mg/kg sc) |               |   |   |    |    |    |    |
|       | A3-APO (1.0 mg/kg im)   |               |   |   |    |    |    |    |
| 8     | Colistin (1.0 mg/kg sc) |               |   |   |    |    |    |    |
|       | A3-APO (0.5 mg/kg im)   |               |   |   |    |    |    |    |
| 9     | Colistin (10 mg/kg sc)  |               |   |   |    |    |    |    |
|       | A3-APO (1.0 mg/kg im)   |               |   |   |    |    |    |    |

| Group | Treatment               | Dosing (hour) |   |   |   |    |    |  |
|-------|-------------------------|---------------|---|---|---|----|----|--|
|       |                         | 1             | 2 | 4 | 6 | 12 | 13 |  |
| 1     | PBS (sc)                |               |   |   |   |    |    |  |
|       |                         |               |   |   |   |    |    |  |
| 2     | Colistin (1.0 mg/kg sc) |               |   |   |   |    |    |  |
|       |                         |               |   |   |   |    |    |  |
| 3     | A3-APO (1.0 mg/kg im)   |               |   |   |   |    |    |  |
|       |                         |               |   |   |   |    |    |  |
| 4     | Colistin (10 mg/kg sc)  |               |   |   |   |    |    |  |
|       | A3-APO (1.0 mg/kg im)   |               |   |   |   |    |    |  |
| 5     | Colistin (10 mg/kg sc)  |               |   |   |   |    |    |  |
|       | A3-APO (0.5 mg/kg im)   |               |   |   |   |    |    |  |
| 6     | A3-APO (0.5 mg/kg im)   |               |   |   |   |    |    |  |
|       |                         |               |   |   |   |    |    |  |
| 7     | A3-APO (0.5 mg/kg ip)   |               |   |   |   |    |    |  |
|       |                         |               |   |   |   |    |    |  |
| 8     | Colistin (1.0 mg/kg sc) |               |   |   |   |    |    |  |
|       | A3-APO (0.5 mg/kg im)   |               |   |   |   |    |    |  |
